# Supplementary material for: Biochemical analyses indicate that binding and cleavage specificities define the ordered processing of human Okazaki fragments by Dna2 and FEN1
Source: PubMed Central journal article supplement — Nucleic Acids Res. 2012 May 8;40(14):6774–86. doi: 10.1093/nar/gks388 (PMC3413157; doi:10.1093/nar/gks388), 2012-05-08
Supplement: supp_gks388_nar-00693-d-2012-File009.pdf [file supp_gks388_nar-00693-d-2012-File009.pdf]

## Supplementary Data

### **Binding and Cleavage Specificities Define the Ordered Processing of Human Okazaki Fragments by Dna2 and FEN1**

**Jason W. Gloor<sup>1</sup>, Lata Balakrishnan<sup>1</sup>, Judith L. Campbell<sup>2</sup> and Robert A. Bambara<sup>1,\*</sup>**

<sup>1</sup>Department of Microbiology and Immunology, University of Rochester School of Medicine and Dentistry, Rochester, New York, 14642.

<sup>2</sup>Braun Laboratories, California Institute of Technology, Pasadena, California, 91125.

\* To whom correspondence should be addressed. Tel: 585-275-3269; Fax: 585-275-6007; Email: [robert\\_bambara@urmc.rochester.edu](mailto:robert_bambara@urmc.rochester.edu).

[S1]

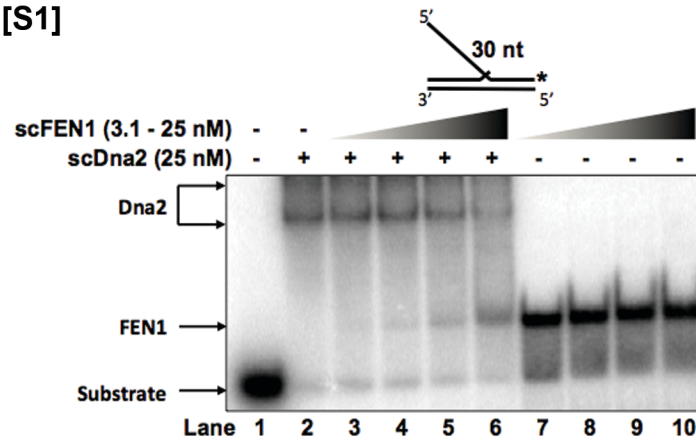

**Supplementary Figure S1.** Yeast FEN1 (scFEN1) displaces Dna2 (scDna2) from long double flap structures. scDna2 (25 nM) was pre-incubated with the experimental 30 nt double flap substrate (U2:T3:D2.30) prior to the addition of increasing concentrations of scFEN1 (3.1, 6.25, 12.5, or 25 nM in lanes 3-6). Lane 1 shows the substrate alone, lane 2 shows scDna2 bound without scFEN1 and lanes 7-10 show scFEN1 alone bound to the substrate at the same concentrations as in 3-6. The position of the substrate alone, scDna2-substrate complex, and scFEN1-substrate complex are indicated to the left of the figure.
